# Supplementary material
Source: PubMed Central journal article supplement (PMC6648674)
Supplement: NIHMS1038016-supplement-1.pdf [file NIHMS1038016-supplement-1.pdf]

## APPENDIX A

## DATA FORMATTING EXAMPLES

1. Long data format, used in separate MLM analyses; the file name is *separatelong*.

*id* = family or dyad indicator  
*mage* = infant age in months at each mother–child lab visit  
*fage* = infant age in months at each father–child lab visit  
*mms* = mother outcome (marital satisfaction score)  
*fms* = father outcome (marital satisfaction score)

| <i>id</i> | <i>mage</i> | <i>fage</i> | <i>mms</i> | <i>fms</i> |
|-----------|-------------|-------------|------------|------------|
| 2         | 3           | 3           | 86.745     | 90.000     |
| 2         | 5           | 5           | 96.000     | 104.000    |
| 2         | 7           | 7           | 104.000    | 123.317    |
| 2         | 12          | 14          | 107.000    | 117.000    |
| 2         | 20          | 20          | 119.000    | 125.000    |
| 3         | 3           | 3           | 130.000    | 140.000    |
| 3         | 5           | 5           | 139.000    | 119.463    |
| 3         | 7           | 7           | 117.000    | 145.000    |
| 3         | 12          | 14          | 135.000    | 134.000    |
| 3         | 20          | 20          | 130.000    | 127.000    |

2. Long data format, used in simultaneous MLM analyses; the file name is *bothlong*

*id* = family or dyad indicator  
*age* = infant age in months at each mother–child or father–child lab visit  
*wave* = measurement occasion (1–5)  
*role* = parent role (1 = mother, 0 = father)  
*mom* = dummy coded for mother versus father report (1 = mother, 0 = father)  
*ms* = outcome (marital satisfaction score)

| <i>id</i> | <i>age</i> | <i>wave</i> | <i>role</i> | <i>mom</i> | <i>ms</i> |
|-----------|------------|-------------|-------------|------------|-----------|
| 2         | 3          | 1           | 1           | 1          | 86.745    |
| 2         | 5          | 2           | 1           | 1          | 96.000    |
| 2         | 7          | 3           | 1           | 1          | 104.000   |
| 2         | 12         | 4           | 1           | 1          | 107.000   |
| 2         | 20         | 5           | 1           | 1          | 119.000   |
| 2         | 3          | 1           | 0           | 0          | 90.000    |
| 2         | 5          | 2           | 0           | 0          | 104.000   |
| 2         | 7          | 3           | 0           | 0          | 123.317   |
| 2         | 14         | 4           | 0           | 0          | 117.000   |
| 2         | 20         | 5           | 0           | 0          | 125.000   |
| 3         | 3          | 1           | 1           | 1          | 130.000   |
| 3         | 5          | 2           | 1           | 1          | 139.000   |
| 3         | 7          | 3           | 1           | 1          | 117.000   |
| 3         | 12         | 4           | 1           | 1          | 135.000   |
| 3         | 20         | 5           | 1           | 1          | 130.000   |
| 3         | 3          | 1           | 0           | 0          | 140.000   |
| 3         | 5          | 2           | 0           | 0          | 119.463   |
| 3         | 7          | 3           | 0           | 0          | 145.000   |
| 3         | 14         | 4           | 0           | 0          | 134.000   |
| 3         | 20         | 5           | 0           | 0          | 127.000   |

3. Wide data format, used in all SEM analyses

*id* = family/dyad identifier  
*MMS* = mother report of marital satisfaction  
*FMS* = father report of marital satisfaction

| <i>id</i> | <i>MMS1</i> | <i>MMS2</i> | <i>MMS3</i> | <i>MMS4</i> | <i>MMS5</i> | <i>FMS1</i> | <i>FMS2</i> | <i>FMS3</i> | <i>FMS4</i> | <i>FMS5</i> |
|-----------|-------------|-------------|-------------|-------------|-------------|-------------|-------------|-------------|-------------|-------------|
| 2         | 86.75       | 96.00       | 104.00      | 107.00      | 119.00      | 90.00       | 104.00      | 123.32      | 117.00      | 125.00      |
| 3         | 130.00      | 139.00      | 117.00      | 135.00      | 130.00      | 140.00      | 119.46      | 145.00      | 134.00      | 127.00      |

## APPENDIX B

### SAS AND MPLUS SYNTAX

#### A. SAS Code

---

##### Center AND SCALE THE AGE VARIABLE

\*for 'separatelong'

cmage = mage/12;

cfage = fage/12;

\*for 'bothlong'

cage = age/12;

##### ICC CALCULATIONS (=intercept variance/[intercept variance + level-1 residual variance])

###### (1) ICC for mothers' data over time;

proc mixed covtest data = separatelong method = reml;

class id;

model mms = /s covb;

random int /type = un subject = id;

run;

###### (2) ICC for fathers' data over time;

proc mixed covtest data = separatelong method = reml;

class id;

model fms = /s covb;

random int /type = un subject = id;

run;

###### (3) ICC for measuring the nonindependence between mothers and fathers at wave $t = 1, 2, \dots$ or $T$ ;

proc mixed covtest data = bothlong method = reml;

where wave = 1; \* need to change 1 to  $t$  for wave  $t$ ;

class id;

model ms = /s covb;

random int /type = un subject = id;

run;

##### SEPARATE ANALYSES (MOTHER)

proc mixed covtest data = separatelong method = ml;

class id;

model mms = cmage /s covb;

random int cmage /type = un subject = id;

run;

##### SEPARATE ANALYSES (FATHER)

proc mixed covtest data = separatelong method = ml;

class id;

model fms = cfage /s covb;

random int cfage /type = un subject = id;

run;

##### Center AND SCALE THE AGE VARIABLE

cage = age/12;

##### SIMULTANEOUS "DEFAULT" METHOD

proc mixed covtest data = bothlong method = ml;

class id;

model ms = cage mom mom \*cage /s covb;

random int cage mom mom \*cage /type = un subject = id;

run;

---

(Continued)

(Continued)

**SIMULTANEOUS “DEPENDENT” METHOD**

```

proc mixed covtest data = bothlong method = ml;
class id role wave;
model ms = cage mom mom*cage /s covb;
random int cage mom mom*cage /type = un subject = id;
repeated role/type = CSH subject = id*wave; * the role and wave variables are used for specifying the “dependent” error covariance structure;
run;

```

**B. SEM Mplus Code**

For our example, we have  $MT1 = 3/12$ ,  $MT2 = 5/12$ ,  $MT3 = 7/12$ ,  $MT4 = 12/12$ , and  $MT5 = 20/12$  for mothers. For fathers, we have  $FT1 = 3/12$ ,  $FT2 = 5/12$ ,  $FT3 = 7/12$ ,  $FT4 = 14/12$ , and  $FT5 = 20/12$

**SEPARATE ANALYSES (MOTHER)**

```

level slope |MMS1@MT1 MMS2@MT2 MMS3@MT3 MMS4@MT4 MMS5@MT5;
!means set to zero
[MMS1@0]; [MMS2@0]; [MMS3@0]; [MMS4@0]; [MMS5@0];
!residual variances constrained to be equal
MMS1 MMS2 MMS3 MMS4 MMS5 (1);
!estimate means and variances of intercept and slope
[level slope]; level slope;

```

**SEPARATE ANALYSES (FATHER)**

```

level slope |FMS1@FT1 FMS2@FT2 FMS3@FT3 FMS4@FT4 FMS5@FT5;
!means set to zero
[FMS1@0]; [FMS2@0]; [FMS3@0]; [FMS4@0]; [FMS5@0];
!residual variances constrained to be equal
FMS1 FMS2 FMS3 FMS4 FMS5 (1);
!estimate means and variances of intercept and slope
[level slope]; level slope;

```

**SIMULTANEOUS “DEFAULT” METHOD**

```

M_level M_slope |MMS1@MT1 MMS 2@MT2 MMS 3@MT3 MMS4@MT4 MMS5@MT5;
F_level F_slope |FMS1@FT1 FMS2@FT2 FMS3@FT3 FMS4@FT4 FMS5@FT5;
!means set to zero
[MMS1@0]; [MMS2@0]; [MMS3@0]; [MMS4@0]; [MMS4@0];
[FMS1@0]; [FMS2@0]; [FMS3@0]; [FMS4@0]; [FMS5@0];
!residual variances constrained to be equal
MMS1 MMS2 MMS3 MMS4 MMS5 (1);
FMS1 FMS2 FMS3 FMS4 FMS5 (1);
!create difference score between M_level and F_level, M_slope and F_slope
!to mimic the MLM specification
Diff_level by M_level@1;
M_level on F_level@1;
Diff_slope by M_slope@1;
M_slope on F_slope@1;
!set means and variances of m_level and m_slope to zero
[M_level@0 M_slope@0]; M_level@0 M_slope@0;
!estimate means of Father intercept and slope
[F_level F_slope];
!estimate means of the difference variables
[Diff_level Diff_slope];
!estimate variances
F_level; F_slope; Diff_level; Diff_slope;

```

(Continued)

(Continued)

**SIMULTANEOUS "DEPENDENT" METHOD**


---

```

M_level M_slope [MMS1@MT1 MMS 2@MT2 MMS 3@MT3 MMS4@MT4 MMS5@MT5;
F_level F_slope [FMS1@FT1 FMS2@FT2 FMS3@FT3 FMS4@FT4 FMS5@FT5;
!means set to zero
[MMS1@0]; [MMS2@0]; [MMS3@0]; [MMS4@0]; [MMS5@0];
[FMS1@0]; [FMS2@0]; [FMS3@0]; [FMS4@0]; [FMS5@0];
!residual variances constrained to be equal
MMS1 MMS2 MMS3 MMS4 MMS5 (1);
FMS1 FMS2 FMS3 FMS4 FMS5 (2);
!at a given time, residuals are allowed to correlate between dyad members
!but constrained to be equal across time points
MMS1 with FMS1 (3);
MMS2 with FMS2 (3);
MMS3 with FMS3 (3);
MMS4 with FMS4 (3);
MMS5 with FMS5 (3);
!create difference score between M_level and F_level, M_slope and F_slope
!to mimic the MLM specification
Diff_level by M_level@1;
M_level on F_level@1;
Diff_slope by M_slope@1;
M_slope on F_slope@1;
!set means and variances of m_level and m_slope to zero
[M_level@0 M_slope@0]; M_level@0 M_slope@0;
!estimate means of Father intercept and slope
[F_level F_slope];
!estimate means of the difference variables
[Diff_level Diff_slope];
!estimate variances
F_level; F_slope; Diff_level; Diff_slope;

```

---
